# Supplementary material for: Social behaviour in bees influences the abundance of Sodalis (Enterobacteriaceae) symbionts
Source: PubMed Central journal article supplement (PMC6083661; doi:10.1098/rsos.180369), 2018-07-11

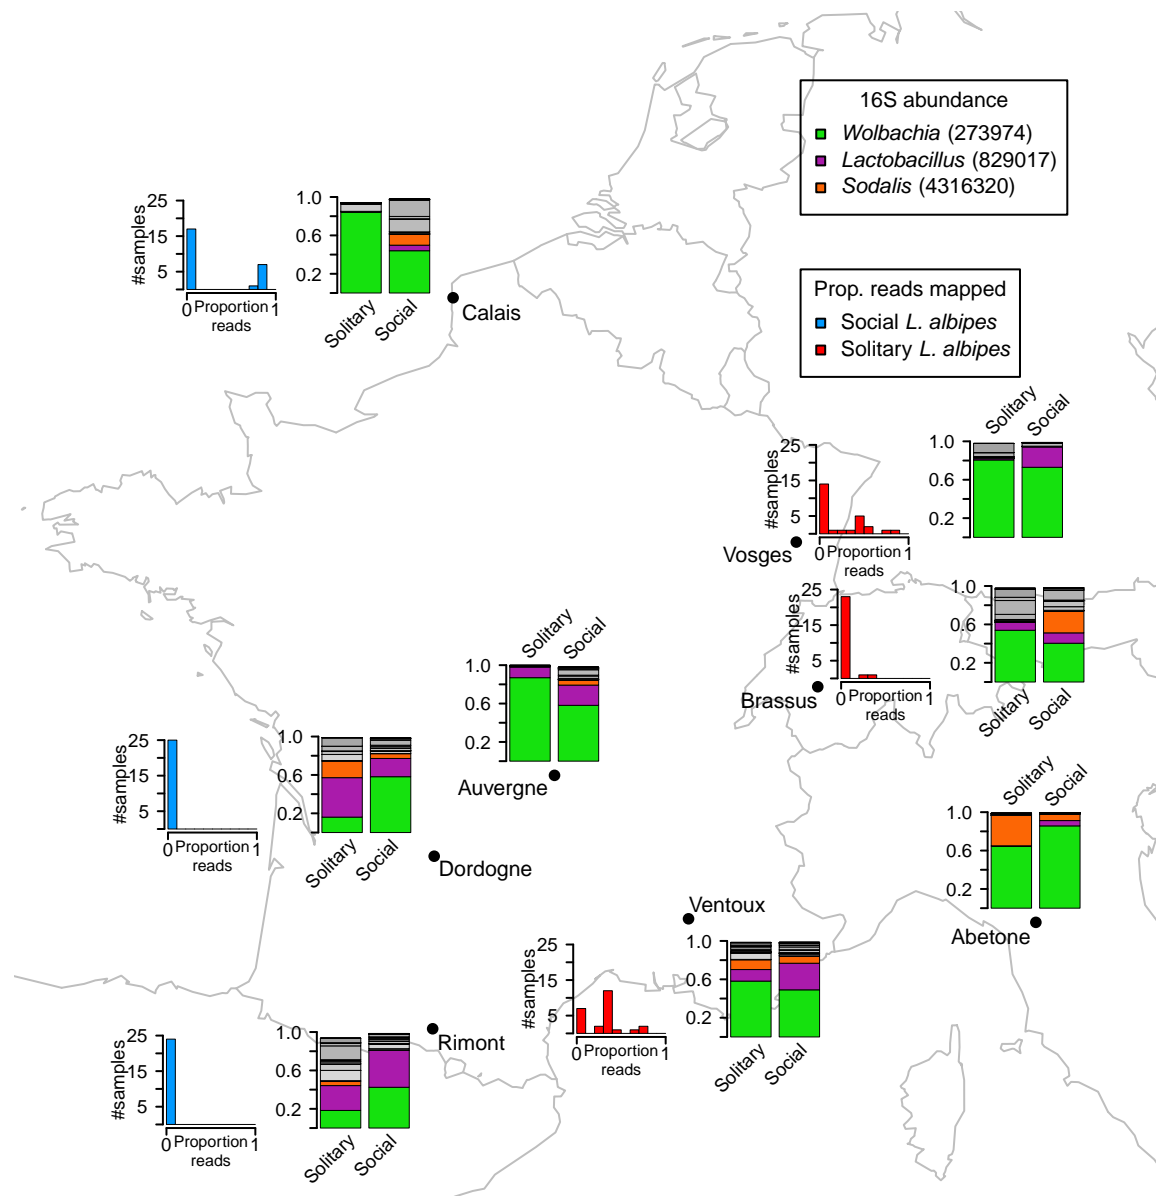

Supplement: rsos180369supp2.pdf [file rsos180369supp2.pdf]
