# Supplementary material for: Social behaviour in bees influences the abundance of Sodalis (Enterobacteriaceae) symbionts
Source: R Soc Open Sci. 2018 Jul 11;5(7):180369. doi: 10.1098/rsos.180369 (PMC6083661; doi:10.1098/rsos.180369)
Supplement: Table S1 [file rsos180369supp11.xlsx]

## Sheet: Table_S1_sample_details
SampleID	BarcodeSequence	Site	Latitude	Longitude	Region	Genus	Species	Sociality	SpeciesSociality	Material	DNA concentration (ng/ul)	#copies 16S gene	Study	#Reads
1064.G.CJV171	TGGTTATGGCAC	NA	NA	NA	Puerto Rico	Apis	mellifera	social	social	drone	NA	NA	dominguez	12493
1064.G.CJV172	AACTCCTGTGGA	NA	NA	NA	Puerto Rico	Apis	mellifera	social	social	drone	NA	NA	dominguez	16987
1064.G.CJV173	TTGCACCGTCGA	NA	NA	NA	Puerto Rico	Apis	mellifera	social	social	drone	NA	NA	dominguez	10940
1064.G.CJV174	ATGGCCTGACTA	NA	NA	NA	Puerto Rico	Apis	mellifera	social	social	drone	NA	NA	dominguez	15022
1064.G.CJV175	TGAGTGGTCTGT	NA	NA	NA	Puerto Rico	Apis	mellifera	social	social	drone	NA	NA	dominguez	8
1064.G.CJV176	TAGCGCGAACTT	NA	NA	NA	Puerto Rico	Apis	mellifera	social	social	drone	NA	NA	dominguez	15982
1064.G.CJV189	GTTTGGCCACAC	NA	NA	NA	Puerto Rico	Apis	mellifera	social	social	nurse	NA	NA	dominguez	18178
1064.G.CJV190	TCATTCCACTCA	NA	NA	NA	Puerto Rico	Apis	mellifera	social	social	nurse	NA	NA	dominguez	22270
1064.G.CJV191	CGACATTTCTCT	NA	NA	NA	Puerto Rico	Apis	mellifera	social	social	nurse	NA	NA	dominguez	8032
1064.G.CJV192	TAGCAGTTGCGT	NA	NA	NA	Puerto Rico	Apis	mellifera	social	social	nurse	NA	NA	dominguez	20382
1064.G.CJV193	AACTTCACTTCC	NA	NA	NA	Puerto Rico	Apis	mellifera	social	social	nurse	NA	NA	dominguez	16298
1064.G.CJV194	TGTGTGTAACGC	NA	NA	NA	Puerto Rico	Apis	mellifera	social	social	nurse	NA	NA	dominguez	17247
1064.G.CJV195	AGGCTAGCAGAG	NA	NA	NA	Puerto Rico	Apis	mellifera	social	social	worker	NA	NA	dominguez	19519
1064.G.CJV196	CACCGAAATCTG	NA	NA	NA	Puerto Rico	Apis	mellifera	social	social	worker	NA	NA	dominguez	27817
1064.G.CJV197	CTATGCCGGCTA	NA	NA	NA	Puerto Rico	Apis	mellifera	social	social	worker	NA	NA	dominguez	20259
1064.G.CJV198	TGTACCAACCGA	NA	NA	NA	Puerto Rico	Apis	mellifera	social	social	worker	NA	NA	dominguez	23284
1064.G.CJV199	AGAGTGCTAATC	NA	NA	NA	Puerto Rico	Apis	mellifera	social	social	worker	NA	NA	dominguez	21973
1064.G.CJV200	CACGATGGTCAT	NA	NA	NA	Puerto Rico	Apis	mellifera	social	social	worker	NA	NA	dominguez	24353
1064.G.CJV201	CACTAACAAACG	NA	NA	NA	Puerto Rico	Apis	mellifera	social	social	worker	NA	NA	dominguez	27099
1064.G.CJV202	TATGGTACCCAG	NA	NA	NA	Puerto Rico	Apis	mellifera	social	social	worker	NA	NA	dominguez	19344
1064.G.CJV203	CTTGGAGGCTTA	NA	NA	NA	Puerto Rico	Apis	mellifera	social	social	worker	NA	NA	dominguez	25618
1064.G.CJV204	GACGCTTTGCTG	NA	NA	NA	Puerto Rico	Apis	mellifera	social	social	worker	NA	NA	dominguez	20620
1064.G.CJV205	GCCTATGAGATC	NA	NA	NA	Puerto Rico	Apis	mellifera	social	social	worker	NA	NA	dominguez	22773
1064.G.CJV206	ATCGCTTAAGGC	NA	NA	NA	Puerto Rico	Apis	mellifera	social	social	worker	NA	NA	dominguez	20539
1064.G.CJV207	CGGCCTAAGTTC	NA	NA	NA	Puerto Rico	Apis	mellifera	social	social	queen	NA	NA	dominguez	20555
1064.G.CJV227	CCTTCAATGGGA	NA	NA	NA	Puerto Rico	Apis	mellifera	social	social	worker	NA	NA	dominguez	0
1064.G.CJV228	ACATACTGAGCA	NA	NA	NA	Puerto Rico	Apis	mellifera	social	social	worker	NA	NA	dominguez	12895
1064.G.CJV229	AAGAGCAGAGCC	NA	NA	NA	Puerto Rico	Apis	mellifera	social	social	worker	NA	NA	dominguez	18567
1064.G.CJV230	TCAACCCGTGAA	NA	NA	NA	Puerto Rico	Apis	mellifera	social	social	worker	NA	NA	dominguez	13
1064.G.CJV231	AGAGAGACAGGT	NA	NA	NA	Puerto Rico	Apis	mellifera	social	social	worker	NA	NA	dominguez	22143
1064.G.CJV232	GCTCAGGACTCT	NA	NA	NA	Puerto Rico	Apis	mellifera	social	social	worker	NA	NA	dominguez	12
1064.G.CV01	ATGCTAACCACG	NA	NA	NA	Puerto Rico	Apis	mellifera	social	social	worker	NA	NA	dominguez	17101
1064.G.CV02	TATCCAAGCGCA	NA	NA	NA	Puerto Rico	Apis	mellifera	social	social	worker	NA	NA	dominguez	23060
1064.G.CV03	TCGCCGTGTACA	NA	NA	NA	Puerto Rico	Apis	mellifera	social	social	worker	NA	NA	dominguez	19581
1064.G.CV04	CTTCCAACTCAT	NA	NA	NA	Puerto Rico	Apis	mellifera	social	social	worker	NA	NA	dominguez	17800
1064.G.CV05	TGTACATCGCCG	NA	NA	NA	Puerto Rico	Apis	mellifera	social	social	worker	NA	NA	dominguez	21592
1064.G.CV06	ACGGCGTTATGT	NA	NA	NA	Puerto Rico	Apis	mellifera	social	social	worker	NA	NA	dominguez	19496
1064.G.CV10	CAAAGCGGTATT	NA	NA	NA	Puerto Rico	Apis	mellifera	social	social	nurse	NA	NA	dominguez	21026
1064.G.CV108	GATCCTCATGCG	NA	NA	NA	Puerto Rico	Apis	mellifera	social	social	queen	NA	NA	dominguez	15790
1064.G.CV11	GAGGACCAGCAA	NA	NA	NA	Puerto Rico	Apis	mellifera	social	social	nurse	NA	NA	dominguez	23158
1064.G.CV12	CGGAGTAATCCT	NA	NA	NA	Puerto Rico	Apis	mellifera	social	social	nurse	NA	NA	dominguez	17432
1064.G.CV209	TACTGAGCCTCG	NA	NA	NA	Puerto Rico	Apis	mellifera	social	social	worker	NA	NA	dominguez	22418
1064.G.CV210	TGGAGCCTTGTC	NA	NA	NA	Puerto Rico	Apis	mellifera	social	social	worker	NA	NA	dominguez	20834
1064.G.CV211	AGCTTCGACAGT	NA	NA	NA	Puerto Rico	Apis	mellifera	social	social	worker	NA	NA	dominguez	15256
1064.G.CV212	AGATGTCCGTCA	NA	NA	NA	Puerto Rico	Apis	mellifera	social	social	worker	NA	NA	dominguez	22430
1064.G.CV213	CCTAGAGAAACT	NA	NA	NA	Puerto Rico	Apis	mellifera	social	social	worker	NA	NA	dominguez	16251
1064.G.CV214	CTGTAAAGGTTG	NA	NA	NA	Puerto Rico	Apis	mellifera	social	social	worker	NA	NA	dominguez	17096
1064.G.CV233	TACGGCAGTTCA	NA	NA	NA	Puerto Rico	Apis	mellifera	social	social	nurse	NA	NA	dominguez	31023
1064.G.CV234	TGCACAGTCGCT	NA	NA	NA	Puerto Rico	Apis	mellifera	social	social	nurse	NA	NA	dominguez	21741
1064.G.CV235	TGCTCCGTAGAA	NA	NA	NA	Puerto Rico	Apis	mellifera	social	social	nurse	NA	NA	dominguez	21209
1064.G.CV236	CGAGTTCATCGA	NA	NA	NA	Puerto Rico	Apis	mellifera	social	social	nurse	NA	NA	dominguez	25027
1064.G.CV237	TAGAGGCGTAGG	NA	NA	NA	Puerto Rico	Apis	mellifera	social	social	nurse	NA	NA	dominguez	12430
1064.G.CV238	TAGACCGACTCC	NA	NA	NA	Puerto Rico	Apis	mellifera	social	social	nurse	NA	NA	dominguez	25147
1064.G.CV239	TTCTCATGGAGG	NA	NA	NA	Puerto Rico	Apis	mellifera	social	social	worker	NA	NA	dominguez	18687
1064.G.CV240	GCTATCAAGACA	NA	NA	NA	Puerto Rico	Apis	mellifera	social	social	worker	NA	NA	dominguez	3531
1064.G.CV241	CGTTCCTTGTTA	NA	NA	NA	Puerto Rico	Apis	mellifera	social	social	worker	NA	NA	dominguez	16626
1064.G.CV242	CATCAAGCATAG	NA	NA	NA	Puerto Rico	Apis	mellifera	social	social	worker	NA	NA	dominguez	18461
1064.G.CV243	GCACATAGTCGT	NA	NA	NA	Puerto Rico	Apis	mellifera	social	social	worker	NA	NA	dominguez	14015
1064.G.CV244	GTCATGCTCCAG	NA	NA	NA	Puerto Rico	Apis	mellifera	social	social	worker	NA	NA	dominguez	14496
1064.G.CV25	CTTCGCGGATGT	NA	NA	NA	Puerto Rico	Apis	mellifera	social	social	nurse	NA	NA	dominguez	21405
1064.G.CV26	TGTGTAGCCATG	NA	NA	NA	Puerto Rico	Apis	mellifera	social	social	nurse	NA	NA	dominguez	20496
1064.G.CV263	ACAGGAGGGTGT	NA	NA	NA	Puerto Rico	Apis	mellifera	social	social	worker	NA	NA	dominguez	30321
1064.G.CV264	ATAGAGGCCATT	NA	NA	NA	Puerto Rico	Apis	mellifera	social	social	worker	NA	NA	dominguez	21727
1064.G.CV265	TAAGCGTCTCGA	NA	NA	NA	Puerto Rico	Apis	mellifera	social	social	worker	NA	NA	dominguez	19895
1064.G.CV266	CGGGATCAAATT	NA	NA	NA	Puerto Rico	Apis	mellifera	social	social	worker	NA	NA	dominguez	25402
1064.G.CV267	ATCTTGGAGTCG	NA	NA	NA	Puerto Rico	Apis	mellifera	social	social	worker	NA	NA	dominguez	23404
1064.G.CV268	GCAAATCAGCCT	NA	NA	NA	Puerto Rico	Apis	mellifera	social	social	worker	NA	NA	dominguez	23792
1064.G.CV27	GTTTCCGTGGTG	NA	NA	NA	Puerto Rico	Apis	mellifera	social	social	nurse	NA	NA	dominguez	24674
1064.G.CV281	TTACCGACGAGT	NA	NA	NA	Puerto Rico	Apis	mellifera	social	social	nurse	NA	NA	dominguez	16778
1064.G.CV282	AAGACGTAGCGG	NA	NA	NA	Puerto Rico	Apis	mellifera	social	social	nurse	NA	NA	dominguez	14582
1064.G.CV283	TGACTAATGGCC	NA	NA	NA	Puerto Rico	Apis	mellifera	social	social	nurse	NA	NA	dominguez	22189
1064.G.CV284	ATTGCAAGCAAC	NA	NA	NA	Puerto Rico	Apis	mellifera	social	social	nurse	NA	NA	dominguez	24551
1064.G.CV285	CACAGTTGAAGT	NA	NA	NA	Puerto Rico	Apis	mellifera	social	social	nurse	NA	NA	dominguez	20341
1064.G.CV286	GATGACCCAAAT	NA	NA	NA	Puerto Rico	Apis	mellifera	social	social	nurse	NA	NA	dominguez	21018
1064.G.CV287	TCTAGCCTGGCA	NA	NA	NA	Puerto Rico	Apis	mellifera	social	social	nurse	NA	NA	dominguez	19311
1064.G.CV288	CGAATGAGTCAT	NA	NA	NA	Puerto Rico	Apis	mellifera	social	social	nurse	NA	NA	dominguez	21574
1064.G.CV289	ATCAGAGCCCAT	NA	NA	NA	Puerto Rico	Apis	mellifera	social	social	nurse	NA	NA	dominguez	18238
1064.G.CV290	CCGACTCTAGGT	NA	NA	NA	Puerto Rico	Apis	mellifera	social	social	nurse	NA	NA	dominguez	19755
1064.G.CV291	GACAACGAATCT	NA	NA	NA	Puerto Rico	Apis	mellifera	social	social	nurse	NA	NA	dominguez	20082
1064.G.CV292	TGAGAAGAAAGG	NA	NA	NA	Puerto Rico	Apis	mellifera	social	social	nurse	NA	NA	dominguez	23185
1064.G.CV293	TGAGGACTACCT	NA	NA	NA	Puerto Rico	Apis	mellifera	social	social	worker	NA	NA	dominguez	13057
1064.G.CV294	AACACTCGATCG	NA	NA	NA	Puerto Rico	Apis	mellifera	social	social	worker	NA	NA	dominguez	18850
1064.G.CV295	GGAGGAGCAATA	NA	NA	NA	Puerto Rico	Apis	mellifera	social	social	worker	NA	NA	dominguez	12350
1064.G.CV296	CTTCCCTAACTC	NA	NA	NA	Puerto Rico	Apis	mellifera	social	social	worker	NA	NA	dominguez	27411
1064.G.CV297	GCTAGACACTAC	NA	NA	NA	Puerto Rico	Apis	mellifera	social	social	worker	NA	NA	dominguez	20871
1064.G.CV298	GATATACCAGTG	NA	NA	NA	Puerto Rico	Apis	mellifera	social	social	worker	NA	NA	dominguez	4
1064.G.CV299	GCCGGTACTCTA	NA	NA	NA	Puerto Rico	Apis	mellifera	social	social	worker	NA	NA	dominguez	20169
1064.G.CV300	CGATATCAGTAG	NA	NA	NA	Puerto Rico	Apis	mellifera	social	social	worker	NA	NA	dominguez	23283
1064.G.CV301	TGTGTTACTCCT	NA	NA	NA	Puerto Rico	Apis	mellifera	social	social	worker	NA	NA	dominguez	24236
1064.G.CV302	TCGCCTATAAGG	NA	NA	NA	Puerto Rico	Apis	mellifera	social	social	worker	NA	NA	dominguez	24846
1064.G.CV303	TAACCCGATAGA	NA	NA	NA	Puerto Rico	Apis	mellifera	social	social	worker	NA	NA	dominguez	24396
1064.G.CV304	CTTGCGGCAATC	NA	NA	NA	Puerto Rico	Apis	mellifera	social	social	worker	NA	NA	dominguez	22108
1064.G.CV305	CATGTAAGGCTC	NA	NA	NA	Puerto Rico	Apis	mellifera	social	social	worker	NA	NA	dominguez	13
1064.G.CV306	GTGTGTGCCATA	NA	NA	NA	Puerto Rico	Apis	mellifera	social	social	worker	NA	NA	dominguez	14198
1064.G.CV307	TAGGCTCGTGCT	NA	NA	NA	Puerto Rico	Apis	mellifera	social	social	worker	NA	NA	dominguez	18567
1064.G.CV308	TTGCCTGGGTCA	NA	NA	NA	Puerto Rico	Apis	mellifera	social	social	worker	NA	NA	dominguez	18587
1064.G.CV309	ACTGGCAAACCT	NA	NA	NA	Puerto Rico	Apis	mellifera	social	social	worker	NA	NA	dominguez	16
1064.G.CV310	CAATGTAGACAC	NA	NA	NA	Puerto Rico	Apis	mellifera	social	social	worker	NA	NA	dominguez	3
1064.G.CV311	GTAGACATGTGT	NA	NA	NA	Puerto Rico	Apis	mellifera	social	social	worker	NA	NA	dominguez	5
1064.G.CV312	CAAGCCCTAGTA	NA	NA	NA	Puerto Rico	Apis	mellifera	social	social	worker	NA	NA	dominguez	10234
1064.G.CV313	CTGAGCTCTGCA	NA	NA	NA	Puerto Rico	Apis	mellifera	social	social	worker	NA	NA	dominguez	0
1064.G.CV314	GTCATAAGAACC	NA	NA	NA	Puerto Rico	Apis	mellifera	social	social	worker	NA	NA	dominguez	24256
1064.G.CV315	CGTAGAGCTCTC	NA	NA	NA	Puerto Rico	Apis	mellifera	social	social	worker	NA	NA	dominguez	16409
1064.G.CV316	CCTCGATGCAGT	NA	NA	NA	Puerto Rico	Apis	mellifera	social	social	worker	NA	NA	dominguez	24398
1064.G.CV317	GCCAAGGATAGG	NA	NA	NA	Puerto Rico	Apis	mellifera	social	social	queen	NA	NA	dominguez	19748
1064.G.CV318	GCCTTACGATAG	NA	NA	NA	Puerto Rico	Apis	mellifera	social	social	nurse	NA	NA	dominguez	19957
1064.G.CV319	AACGAGGCAACG	NA	NA	NA	Puerto Rico	Apis	mellifera	social	social	nurse	NA	NA	dominguez	25087
1064.G.CV320	ACACCTGCGATC	NA	NA	NA	Puerto Rico	Apis	mellifera	social	social	nurse	NA	NA	dominguez	25895
1064.G.CV321	ACTAGCGTTCAG	NA	NA	NA	Puerto Rico	Apis	mellifera	social	social	nurse	NA	NA	dominguez	23038
1064.G.CV322	TGCGAGTATATG	NA	NA	NA	Puerto Rico	Apis	mellifera	social	social	nurse	NA	NA	dominguez	26030
1064.G.CV323	TCTGGAACGGTT	NA	NA	NA	Puerto Rico	Apis	mellifera	social	social	nurse	NA	NA	dominguez	23864
1064.G.CV324	AGCGGCCTATTA	NA	NA	NA	Puerto Rico	Apis	mellifera	social	social	worker	NA	NA	dominguez	27768
1064.G.CV325	TGGAATTCGGCT	NA	NA	NA	Puerto Rico	Apis	mellifera	social	social	worker	NA	NA	dominguez	27415
1064.G.CV326	TGCCGAGTAATC	NA	NA	NA	Puerto Rico	Apis	mellifera	social	social	worker	NA	NA	dominguez	23536
1064.G.CV327	GTAACCACCACC	NA	NA	NA	Puerto Rico	Apis	mellifera	social	social	worker	NA	NA	dominguez	25083
1064.G.CV328	AACCATGCCAAC	NA	NA	NA	Puerto Rico	Apis	mellifera	social	social	worker	NA	NA	dominguez	32604
1064.G.CV329	ACTACCTCTTCA	NA	NA	NA	Puerto Rico	Apis	mellifera	social	social	worker	NA	NA	dominguez	29498
1064.G.CV330	ATTGCTGGTCGA	NA	NA	NA	Puerto Rico	Apis	mellifera	social	social	worker	NA	NA	dominguez	22144
1064.G.CV331	ACGGGATACAGG	NA	NA	NA	Puerto Rico	Apis	mellifera	social	social	worker	NA	NA	dominguez	25256
1064.G.CV332	TCCGTCATGGGT	NA	NA	NA	Puerto Rico	Apis	mellifera	social	social	worker	NA	NA	dominguez	19926
1064.G.CV333	GCACAAGGCAAG	NA	NA	NA	Puerto Rico	Apis	mellifera	social	social	worker	NA	NA	dominguez	23549
1064.G.CV334	GCGAGTTCCTGT	NA	NA	NA	Puerto Rico	Apis	mellifera	social	social	worker	NA	NA	dominguez	18962
1064.G.CV335	TACCTAGTGAGA	NA	NA	NA	Puerto Rico	Apis	mellifera	social	social	worker	NA	NA	dominguez	19739
1064.G.CV336	TTCCTGTTAACC	NA	NA	NA	Puerto Rico	Apis	mellifera	social	social	worker	NA	NA	dominguez	25609
1064.G.CV337	CAGTCTAGTACG	NA	NA	NA	Puerto Rico	Apis	mellifera	social	social	worker	NA	NA	dominguez	28264
1064.G.CV338	TGTGGTGATGTA	NA	NA	NA	Puerto Rico	Apis	mellifera	social	social	worker	NA	NA	dominguez	18487
1064.G.CV339	CCGAAGATTCTG	NA	NA	NA	Puerto Rico	Apis	mellifera	social	social	worker	NA	NA	dominguez	25225
1064.G.CV340	GAAGTAGCGAGC	NA	NA	NA	Puerto Rico	Apis	mellifera	social	social	worker	NA	NA	dominguez	23402
1064.G.CV341	GCGGAAACATGG	NA	NA	NA	Puerto Rico	Apis	mellifera	social	social	worker	NA	NA	dominguez	21591
1064.G.CV342	TGCATGACAGTC	NA	NA	NA	Puerto Rico	Apis	mellifera	social	social	worker	NA	NA	dominguez	23796
1064.G.CV343	CTACCGATTGCG	NA	NA	NA	Puerto Rico	Apis	mellifera	social	social	worker	NA	NA	dominguez	21876
1064.G.CV344	AGCCAGTCATAC	NA	NA	NA	Puerto Rico	Apis	mellifera	social	social	worker	NA	NA	dominguez	20291
1064.G.CV345	GTTTGCTCGAGA	NA	NA	NA	Puerto Rico	Apis	mellifera	social	social	worker	NA	NA	dominguez	19989
1064.G.CV346	GAACAAAGAGCG	NA	NA	NA	Puerto Rico	Apis	mellifera	social	social	worker	NA	NA	dominguez	18417
1064.G.CV43	TAATGCCCAGGT	NA	NA	NA	Puerto Rico	Apis	mellifera	social	social	worker	NA	NA	dominguez	18338
1064.G.CV44	CCACATTGGGTC	NA	NA	NA	Puerto Rico	Apis	mellifera	social	social	worker	NA	NA	dominguez	20756
1064.G.CV45	AAGTCACACACA	NA	NA	NA	Puerto Rico	Apis	mellifera	social	social	worker	NA	NA	dominguez	18759
1064.G.CV46	CTAGCTATGGAC	NA	NA	NA	Puerto Rico	Apis	mellifera	social	social	worker	NA	NA	dominguez	21556
1064.G.CV47	ACCTGGGAATAT	NA	NA	NA	Puerto Rico	Apis	mellifera	social	social	worker	NA	NA	dominguez	20413
1064.G.CV48	ATATGACCCAGC	NA	NA	NA	Puerto Rico	Apis	mellifera	social	social	worker	NA	NA	dominguez	16038
1064.G.CV72	ATTGAGTGAGTC	NA	NA	NA	Puerto Rico	Apis	mellifera	social	social	worker	NA	NA	dominguez	23348
1064.G.CV73	GCTAGTTATGGA	NA	NA	NA	Puerto Rico	Apis	mellifera	social	social	worker	NA	NA	dominguez	23691
1064.G.CV74	GGCTGCATACTC	NA	NA	NA	Puerto Rico	Apis	mellifera	social	social	worker	NA	NA	dominguez	21121
1064.G.CV75	AAGTGGCTATCC	NA	NA	NA	Puerto Rico	Apis	mellifera	social	social	worker	NA	NA	dominguez	24192
1064.G.CV76	TCGATTGGCCGT	NA	NA	NA	Puerto Rico	Apis	mellifera	social	social	worker	NA	NA	dominguez	26305
1064.G.CV77	TTGGGCCACATA	NA	NA	NA	Puerto Rico	Apis	mellifera	social	social	worker	NA	NA	dominguez	24858
1064.G.CV90	GACGCACTAACT	NA	NA	NA	Puerto Rico	Apis	mellifera	social	social	drone	NA	NA	dominguez	17039
1064.G.CV91	TAAGGCATCGCT	NA	NA	NA	Puerto Rico	Apis	mellifera	social	social	drone	NA	NA	dominguez	23222
1064.G.CV92	CGCACTACGCAT	NA	NA	NA	Puerto Rico	Apis	mellifera	social	social	drone	NA	NA	dominguez	18181
1064.G.CV93	CTACGAAAGCCT	NA	NA	NA	Puerto Rico	Apis	mellifera	social	social	drone	NA	NA	dominguez	13254
1064.G.CV94	GGCATGTTATCG	NA	NA	NA	Puerto Rico	Apis	mellifera	social	social	drone	NA	NA	dominguez	1623
1064.G.CV95	CTACTTACATCC	NA	NA	NA	Puerto Rico	Apis	mellifera	social	social	drone	NA	NA	dominguez	14624
1064.G.GVR165	CCAGGGACTTCT	NA	NA	NA	Puerto Rico	Apis	mellifera	social	social	worker	NA	NA	dominguez	13877
1064.G.GVR166	CCTGCTTCCTTC	NA	NA	NA	Puerto Rico	Apis	mellifera	social	social	worker	NA	NA	dominguez	12688
1064.G.GVR167	GGCCTATAAGTC	NA	NA	NA	Puerto Rico	Apis	mellifera	social	social	worker	NA	NA	dominguez	21895
1064.G.GVR168	TCGGCGATCATC	NA	NA	NA	Puerto Rico	Apis	mellifera	social	social	worker	NA	NA	dominguez	10
1064.G.GVR169	ACAAGAACCTTG	NA	NA	NA	Puerto Rico	Apis	mellifera	social	social	worker	NA	NA	dominguez	15094
1064.G.GVR170	AACTGTTCGCGC	NA	NA	NA	Puerto Rico	Apis	mellifera	social	social	worker	NA	NA	dominguez	4
1064.H.CJV171	AGCGCTCACATC	NA	NA	NA	Puerto Rico	Apis	mellifera	social	social	drone	NA	NA	dominguez	5
1064.H.CJV172	CGAGGTTCTGAT	NA	NA	NA	Puerto Rico	Apis	mellifera	social	social	drone	NA	NA	dominguez	17621
1064.H.CJV173	TAATGGTCGTAG	NA	NA	NA	Puerto Rico	Apis	mellifera	social	social	drone	NA	NA	dominguez	31840
1064.H.CJV174	TGCTACAGACGT	NA	NA	NA	Puerto Rico	Apis	mellifera	social	social	drone	NA	NA	dominguez	3
1064.H.CJV175	ACGCACATACAA	NA	NA	NA	Puerto Rico	Apis	mellifera	social	social	drone	NA	NA	dominguez	23612
1064.H.CJV176	GATAGCACTCGT	NA	NA	NA	Puerto Rico	Apis	mellifera	social	social	drone	NA	NA	dominguez	11669
1064.H.CJV189	CGAAGCATCTAC	NA	NA	NA	Puerto Rico	Apis	mellifera	social	social	nurse	NA	NA	dominguez	13968
1064.H.CJV190	TCAGGTTGCCCA	NA	NA	NA	Puerto Rico	Apis	mellifera	social	social	nurse	NA	NA	dominguez	6
1064.H.CJV191	GTCACATCACGA	NA	NA	NA	Puerto Rico	Apis	mellifera	social	social	nurse	NA	NA	dominguez	17880
1064.H.CJV192	GGACGTTAACTA	NA	NA	NA	Puerto Rico	Apis	mellifera	social	social	nurse	NA	NA	dominguez	18746
1064.H.CJV193	CACGCTATTGGA	NA	NA	NA	Puerto Rico	Apis	mellifera	social	social	nurse	NA	NA	dominguez	21312
1064.H.CJV194	CCAGTGGATATA	NA	NA	NA	Puerto Rico	Apis	mellifera	social	social	nurse	NA	NA	dominguez	5
1064.H.CJV195	CCAATCGTGCAA	NA	NA	NA	Puerto Rico	Apis	mellifera	social	social	worker	NA	NA	dominguez	17844
1064.H.CJV196	GTCACTCCGAAC	NA	NA	NA	Puerto Rico	Apis	mellifera	social	social	worker	NA	NA	dominguez	13434
1064.H.CJV197	TGACGTAGAACT	NA	NA	NA	Puerto Rico	Apis	mellifera	social	social	worker	NA	NA	dominguez	57
1064.H.CJV198	GTGGTATGGGAG	NA	NA	NA	Puerto Rico	Apis	mellifera	social	social	worker	NA	NA	dominguez	19433
1064.H.CJV199	AGGGTACAGGGT	NA	NA	NA	Puerto Rico	Apis	mellifera	social	social	worker	NA	NA	dominguez	15931
1064.H.CJV200	TTGGCGGGTTAT	NA	NA	NA	Puerto Rico	Apis	mellifera	social	social	worker	NA	NA	dominguez	19498
1064.H.CJV201	GTCACCAATCCG	NA	NA	NA	Puerto Rico	Apis	mellifera	social	social	worker	NA	NA	dominguez	16792
1064.H.CJV202	TTCCAGGCAGAT	NA	NA	NA	Puerto Rico	Apis	mellifera	social	social	worker	NA	NA	dominguez	14622
1064.H.CJV203	CACGACTTGACA	NA	NA	NA	Puerto Rico	Apis	mellifera	social	social	worker	NA	NA	dominguez	21
1064.H.CJV204	ACGTGGTTCCAC	NA	NA	NA	Puerto Rico	Apis	mellifera	social	social	worker	NA	NA	dominguez	17628
1064.H.CJV205	ACAGGGTTTGTA	NA	NA	NA	Puerto Rico	Apis	mellifera	social	social	worker	NA	NA	dominguez	22132
1064.H.CJV206	CAAACCTATGGC	NA	NA	NA	Puerto Rico	Apis	mellifera	social	social	worker	NA	NA	dominguez	14482
1064.H.CJV207	CGTGCACAATTG	NA	NA	NA	Puerto Rico	Apis	mellifera	social	social	queen	NA	NA	dominguez	15990
1064.H.CJV227	ATCTAGTGGCAA	NA	NA	NA	Puerto Rico	Apis	mellifera	social	social	worker	NA	NA	dominguez	0
1064.H.CJV228	TTGACGACATCG	NA	NA	NA	Puerto Rico	Apis	mellifera	social	social	worker	NA	NA	dominguez	0
1064.H.CJV229	GGCTAAACTATG	NA	NA	NA	Puerto Rico	Apis	mellifera	social	social	worker	NA	NA	dominguez	19
1064.H.CJV230	GGAGAGATCACG	NA	NA	NA	Puerto Rico	Apis	mellifera	social	social	worker	NA	NA	dominguez	10
1064.H.CJV231	GTTTGAAACACG	NA	NA	NA	Puerto Rico	Apis	mellifera	social	social	worker	NA	NA	dominguez	31
1064.H.CJV232	TCGCCAGTGCAT	NA	NA	NA	Puerto Rico	Apis	mellifera	social	social	worker	NA	NA	dominguez	15
1064.H.CV01	ACCAATCTCGGC	NA	NA	NA	Puerto Rico	Apis	mellifera	social	social	worker	NA	NA	dominguez	13935
1064.H.CV02	GTACTGAAGATC	NA	NA	NA	Puerto Rico	Apis	mellifera	social	social	worker	NA	NA	dominguez	33
1064.H.CV03	AACTGCGATATG	NA	NA	NA	Puerto Rico	Apis	mellifera	social	social	worker	NA	NA	dominguez	20525
1064.H.CV04	GAGATCGCCTAT	NA	NA	NA	Puerto Rico	Apis	mellifera	social	social	worker	NA	NA	dominguez	9130
1064.H.CV05	TGTTAAGCAGCA	NA	NA	NA	Puerto Rico	Apis	mellifera	social	social	worker	NA	NA	dominguez	9262
1064.H.CV06	ACTTTGCTTTGC	NA	NA	NA	Puerto Rico	Apis	mellifera	social	social	worker	NA	NA	dominguez	32
1064.H.CV10	CGAAACTACGTA	NA	NA	NA	Puerto Rico	Apis	mellifera	social	social	nurse	NA	NA	dominguez	50
1064.H.CV108	ATTATCGTCCCT	NA	NA	NA	Puerto Rico	Apis	mellifera	social	social	queen	NA	NA	dominguez	32
1064.H.CV11	AATAGCATGTCG	NA	NA	NA	Puerto Rico	Apis	mellifera	social	social	nurse	NA	NA	dominguez	8
1064.H.CV12	CTGTGTCCATGG	NA	NA	NA	Puerto Rico	Apis	mellifera	social	social	nurse	NA	NA	dominguez	20
1064.H.CV209	GATGGACTTCAA	NA	NA	NA	Puerto Rico	Apis	mellifera	social	social	worker	NA	NA	dominguez	19821
1064.H.CV210	AGAAGGCCTTAT	NA	NA	NA	Puerto Rico	Apis	mellifera	social	social	worker	NA	NA	dominguez	19566
1064.H.CV211	CTCGATGTAAGC	NA	NA	NA	Puerto Rico	Apis	mellifera	social	social	worker	NA	NA	dominguez	11461
1064.H.CV212	ATACGCATCAAG	NA	NA	NA	Puerto Rico	Apis	mellifera	social	social	worker	NA	NA	dominguez	13335
1064.H.CV213	GCACCTGTTGAA	NA	NA	NA	Puerto Rico	Apis	mellifera	social	social	worker	NA	NA	dominguez	14152
1064.H.CV214	GAGGTTCTTGAC	NA	NA	NA	Puerto Rico	Apis	mellifera	social	social	worker	NA	NA	dominguez	29048
1064.H.CV233	TGAGTCATTGAG	NA	NA	NA	Puerto Rico	Apis	mellifera	social	social	nurse	NA	NA	dominguez	18
1064.H.CV234	CTCTAGAAGAGT	NA	NA	NA	Puerto Rico	Apis	mellifera	social	social	nurse	NA	NA	dominguez	13
1064.H.CV235	CATGCGGATCCT	NA	NA	NA	Puerto Rico	Apis	mellifera	social	social	nurse	NA	NA	dominguez	11
1064.H.CV236	TGATAGGTACAC	NA	NA	NA	Puerto Rico	Apis	mellifera	social	social	nurse	NA	NA	dominguez	20
1064.H.CV237	AAGCAGATTGTC	NA	NA	NA	Puerto Rico	Apis	mellifera	social	social	nurse	NA	NA	dominguez	57
1064.H.CV238	TCAGCGCCGTTA	NA	NA	NA	Puerto Rico	Apis	mellifera	social	social	nurse	NA	NA	dominguez	30
1064.H.CV239	CATAGTGATTGG	NA	NA	NA	Puerto Rico	Apis	mellifera	social	social	worker	NA	NA	dominguez	17622
1064.H.CV240	CCGTGACAACTC	NA	NA	NA	Puerto Rico	Apis	mellifera	social	social	worker	NA	NA	dominguez	32
1064.H.CV241	GGAATTATCGGT	NA	NA	NA	Puerto Rico	Apis	mellifera	social	social	worker	NA	NA	dominguez	18561
1064.H.CV242	CATCGCGTTGAC	NA	NA	NA	Puerto Rico	Apis	mellifera	social	social	worker	NA	NA	dominguez	12065
1064.H.CV243	GGCAAATACACT	NA	NA	NA	Puerto Rico	Apis	mellifera	social	social	worker	NA	NA	dominguez	10045
1064.H.CV244	CCTAGTAAGCTG	NA	NA	NA	Puerto Rico	Apis	mellifera	social	social	worker	NA	NA	dominguez	13892
1064.H.CV25	ATAGGCTGTAGT	NA	NA	NA	Puerto Rico	Apis	mellifera	social	social	nurse	NA	NA	dominguez	51
1064.H.CV26	AAGGGCGCTGAA	NA	NA	NA	Puerto Rico	Apis	mellifera	social	social	nurse	NA	NA	dominguez	10390
1064.H.CV263	GTCAACGCTGTC	NA	NA	NA	Puerto Rico	Apis	mellifera	social	social	worker	NA	NA	dominguez	17524
1064.H.CV264	GCTGTCGTCAAC	NA	NA	NA	Puerto Rico	Apis	mellifera	social	social	worker	NA	NA	dominguez	11
1064.H.CV265	AAGCTTGAAACC	NA	NA	NA	Puerto Rico	Apis	mellifera	social	social	worker	NA	NA	dominguez	18424
1064.H.CV266	ATAGCTTCGTGG	NA	NA	NA	Puerto Rico	Apis	mellifera	social	social	worker	NA	NA	dominguez	8
1064.H.CV267	AGTCATCGAATG	NA	NA	NA	Puerto Rico	Apis	mellifera	social	social	worker	NA	NA	dominguez	2
1064.H.CV268	AGCACCGGTCTT	NA	NA	NA	Puerto Rico	Apis	mellifera	social	social	worker	NA	NA	dominguez	21
1064.H.CV27	AGGAACCAGACG	NA	NA	NA	Puerto Rico	Apis	mellifera	social	social	nurse	NA	NA	dominguez	42
1064.H.CV281	GCTTAGATGTAG	NA	NA	NA	Puerto Rico	Apis	mellifera	social	social	nurse	NA	NA	dominguez	13651
1064.H.CV282	TTACCTTACACC	NA	NA	NA	Puerto Rico	Apis	mellifera	social	social	nurse	NA	NA	dominguez	18086
1064.H.CV283	CTCTCTCACTTG	NA	NA	NA	Puerto Rico	Apis	mellifera	social	social	nurse	NA	NA	dominguez	6
1064.H.CV284	CACGTGACATGT	NA	NA	NA	Puerto Rico	Apis	mellifera	social	social	nurse	NA	NA	dominguez	3
1064.H.CV285	CTAGGATCACTG	NA	NA	NA	Puerto Rico	Apis	mellifera	social	social	nurse	NA	NA	dominguez	12875
1064.H.CV286	ACCGGAGTAGGA	NA	NA	NA	Puerto Rico	Apis	mellifera	social	social	nurse	NA	NA	dominguez	6
1064.H.CV287	CACTTTGGGTGC	NA	NA	NA	Puerto Rico	Apis	mellifera	social	social	nurse	NA	NA	dominguez	24
1064.H.CV288	AATGCAATGCGT	NA	NA	NA	Puerto Rico	Apis	mellifera	social	social	nurse	NA	NA	dominguez	24074
1064.H.CV289	CAACGCTAGAAT	NA	NA	NA	Puerto Rico	Apis	mellifera	social	social	nurse	NA	NA	dominguez	25545
1064.H.CV290	TCTGTAGAGCCA	NA	NA	NA	Puerto Rico	Apis	mellifera	social	social	nurse	NA	NA	dominguez	47
1064.H.CV291	ATCCTACGAGCA	NA	NA	NA	Puerto Rico	Apis	mellifera	social	social	nurse	NA	NA	dominguez	87
1064.H.CV292	TGCGGTTGACTC	NA	NA	NA	Puerto Rico	Apis	mellifera	social	social	nurse	NA	NA	dominguez	17605
1064.H.CV293	CAATCGGCTTGC	NA	NA	NA	Puerto Rico	Apis	mellifera	social	social	worker	NA	NA	dominguez	14264
1064.H.CV294	TGACCGGCTGTT	NA	NA	NA	Puerto Rico	Apis	mellifera	social	social	worker	NA	NA	dominguez	10
1064.H.CV295	AGCGACGAAGAC	NA	NA	NA	Puerto Rico	Apis	mellifera	social	social	worker	NA	NA	dominguez	2791
1064.H.CV296	TGGAAGAACGGC	NA	NA	NA	Puerto Rico	Apis	mellifera	social	social	worker	NA	NA	dominguez	7
1064.H.CV297	TTGGATTGAACG	NA	NA	NA	Puerto Rico	Apis	mellifera	social	social	worker	NA	NA	dominguez	21680
1064.H.CV298	AACAAACTGCCA	NA	NA	NA	Puerto Rico	Apis	mellifera	social	social	worker	NA	NA	dominguez	25655
1064.H.CV299	TCGGATCTGTGA	NA	NA	NA	Puerto Rico	Apis	mellifera	social	social	worker	NA	NA	dominguez	66
1064.H.CV300	CACAGGATTACC	NA	NA	NA	Puerto Rico	Apis	mellifera	social	social	worker	NA	NA	dominguez	46
1064.H.CV301	CATAAGGGAGGC	NA	NA	NA	Puerto Rico	Apis	mellifera	social	social	worker	NA	NA	dominguez	36
1064.H.CV302	GGTACCTGCAAT	NA	NA	NA	Puerto Rico	Apis	mellifera	social	social	worker	NA	NA	dominguez	13280
1064.H.CV303	AGTGGCACTATC	NA	NA	NA	Puerto Rico	Apis	mellifera	social	social	worker	NA	NA	dominguez	20829
1064.H.CV304	GTGTGCTAACGT	NA	NA	NA	Puerto Rico	Apis	mellifera	social	social	worker	NA	NA	dominguez	9742
1064.H.CV305	CCGACATTGTAG	NA	NA	NA	Puerto Rico	Apis	mellifera	social	social	worker	NA	NA	dominguez	2
1064.H.CV306	TGCAAGCTAAGT	NA	NA	NA	Puerto Rico	Apis	mellifera	social	social	worker	NA	NA	dominguez	15
1064.H.CV307	TGACAACCGAAT	NA	NA	NA	Puerto Rico	Apis	mellifera	social	social	worker	NA	NA	dominguez	15
1064.H.CV308	CTCCTTAAGGCG	NA	NA	NA	Puerto Rico	Apis	mellifera	social	social	worker	NA	NA	dominguez	12
1064.H.CV309	CAATTCTGCTTC	NA	NA	NA	Puerto Rico	Apis	mellifera	social	social	worker	NA	NA	dominguez	11
1064.H.CV310	AATCAGAGCTTG	NA	NA	NA	Puerto Rico	Apis	mellifera	social	social	worker	NA	NA	dominguez	1
1064.H.CV311	TACAGTTACGCG	NA	NA	NA	Puerto Rico	Apis	mellifera	social	social	worker	NA	NA	dominguez	19371
1064.H.CV312	TAGTGTCGGATC	NA	NA	NA	Puerto Rico	Apis	mellifera	social	social	worker	NA	NA	dominguez	15213
1064.H.CV313	CTTCGACTTTCC	NA	NA	NA	Puerto Rico	Apis	mellifera	social	social	worker	NA	NA	dominguez	18988
1064.H.CV314	GTCCGCAAGTTA	NA	NA	NA	Puerto Rico	Apis	mellifera	social	social	worker	NA	NA	dominguez	6160
1064.H.CV315	CCTCTGAGAGCT	NA	NA	NA	Puerto Rico	Apis	mellifera	social	social	worker	NA	NA	dominguez	23
1064.H.CV316	GCGGACTATTCA	NA	NA	NA	Puerto Rico	Apis	mellifera	social	social	worker	NA	NA	dominguez	1670
1064.H.CV317	CGCCACGTGTAT	NA	NA	NA	Puerto Rico	Apis	mellifera	social	social	queen	NA	NA	dominguez	2573
1064.H.CV318	TGGCGATACGTT	NA	NA	NA	Puerto Rico	Apis	mellifera	social	social	nurse	NA	NA	dominguez	22
1064.H.CV319	TACCTGTGTCTT	NA	NA	NA	Puerto Rico	Apis	mellifera	social	social	nurse	NA	NA	dominguez	20
1064.H.CV320	GAAGACAGCGAC	NA	NA	NA	Puerto Rico	Apis	mellifera	social	social	nurse	NA	NA	dominguez	22
1064.H.CV321	GGCGTTGCATTC	NA	NA	NA	Puerto Rico	Apis	mellifera	social	social	nurse	NA	NA	dominguez	17
1064.H.CV322	TTGCGACAAAGT	NA	NA	NA	Puerto Rico	Apis	mellifera	social	social	nurse	NA	NA	dominguez	21
1064.H.CV323	TACCACAACGAA	NA	NA	NA	Puerto Rico	Apis	mellifera	social	social	nurse	NA	NA	dominguez	23
1064.H.CV324	GCAAGCTGTCTC	NA	NA	NA	Puerto Rico	Apis	mellifera	social	social	worker	NA	NA	dominguez	19765
1064.H.CV325	TCTTCAACTACC	NA	NA	NA	Puerto Rico	Apis	mellifera	social	social	worker	NA	NA	dominguez	10
1064.H.CV326	TAAGATGCAGTC	NA	NA	NA	Puerto Rico	Apis	mellifera	social	social	worker	NA	NA	dominguez	21652
1064.H.CV327	ACCTTGACAAGA	NA	NA	NA	Puerto Rico	Apis	mellifera	social	social	worker	NA	NA	dominguez	18314
1064.H.CV328	CATAGCTCGGTC	NA	NA	NA	Puerto Rico	Apis	mellifera	social	social	worker	NA	NA	dominguez	21
1064.H.CV329	TATGGAGCTAGT	NA	NA	NA	Puerto Rico	Apis	mellifera	social	social	worker	NA	NA	dominguez	20
1064.H.CV330	TGAGGTTTGATG	NA	NA	NA	Puerto Rico	Apis	mellifera	social	social	worker	NA	NA	dominguez	25
1064.H.CV331	AAGAAGCCGGAC	NA	NA	NA	Puerto Rico	Apis	mellifera	social	social	worker	NA	NA	dominguez	12640
1064.H.CV332	AAGAGTCTCTAG	NA	NA	NA	Puerto Rico	Apis	mellifera	social	social	worker	NA	NA	dominguez	57
1064.H.CV333	AGATCTATGCAG	NA	NA	NA	Puerto Rico	Apis	mellifera	social	social	worker	NA	NA	dominguez	12737
1064.H.CV334	CGGCAAACACTT	NA	NA	NA	Puerto Rico	Apis	mellifera	social	social	worker	NA	NA	dominguez	19
1064.H.CV335	TTCCGAATCGGC	NA	NA	NA	Puerto Rico	Apis	mellifera	social	social	worker	NA	NA	dominguez	32
1064.H.CV336	GTACTACCTCGG	NA	NA	NA	Puerto Rico	Apis	mellifera	social	social	worker	NA	NA	dominguez	8
1064.H.CV337	CTATCCAAGTGG	NA	NA	NA	Puerto Rico	Apis	mellifera	social	social	worker	NA	NA	dominguez	12
1064.H.CV338	GTGTCCGGATTC	NA	NA	NA	Puerto Rico	Apis	mellifera	social	social	worker	NA	NA	dominguez	25932
1064.H.CV339	CTTTCGTTCAAC	NA	NA	NA	Puerto Rico	Apis	mellifera	social	social	worker	NA	NA	dominguez	26857
1064.H.CV340	GTTGGCGTTACA	NA	NA	NA	Puerto Rico	Apis	mellifera	social	social	worker	NA	NA	dominguez	24365
1064.H.CV341	TTGCGGACCCTA	NA	NA	NA	Puerto Rico	Apis	mellifera	social	social	worker	NA	NA	dominguez	19790
1064.H.CV342	AACGTTAGTGTG	NA	NA	NA	Puerto Rico	Apis	mellifera	social	social	worker	NA	NA	dominguez	24781
1064.H.CV343	TCAATCGCTTTC	NA	NA	NA	Puerto Rico	Apis	mellifera	social	social	worker	NA	NA	dominguez	24
1064.H.CV344	TCACCCAAGGTA	NA	NA	NA	Puerto Rico	Apis	mellifera	social	social	worker	NA	NA	dominguez	21086
1064.H.CV345	TAACGGCGCTCT	NA	NA	NA	Puerto Rico	Apis	mellifera	social	social	worker	NA	NA	dominguez	23073
1064.H.CV346	CAAACGCACTAA	NA	NA	NA	Puerto Rico	Apis	mellifera	social	social	worker	NA	NA	dominguez	21631
1064.H.CV43	TATGAACGTCCG	NA	NA	NA	Puerto Rico	Apis	mellifera	social	social	worker	NA	NA	dominguez	38
1064.H.CV44	TCAGTCAGATGA	NA	NA	NA	Puerto Rico	Apis	mellifera	social	social	worker	NA	NA	dominguez	12236
1064.H.CV45	GCTGTGATTCGA	NA	NA	NA	Puerto Rico	Apis	mellifera	social	social	worker	NA	NA	dominguez	14010
1064.H.CV46	CTTGACGAGGTT	NA	NA	NA	Puerto Rico	Apis	mellifera	social	social	worker	NA	NA	dominguez	36
1064.H.CV47	CTCTGCCTAATT	NA	NA	NA	Puerto Rico	Apis	mellifera	social	social	worker	NA	NA	dominguez	47
1064.H.CV48	CTCTATTCCACC	NA	NA	NA	Puerto Rico	Apis	mellifera	social	social	worker	NA	NA	dominguez	7901
1064.H.CV72	TTATGGTACGGA	NA	NA	NA	Puerto Rico	Apis	mellifera	social	social	worker	NA	NA	dominguez	20005
1064.H.CV73	CAGATTAACCAG	NA	NA	NA	Puerto Rico	Apis	mellifera	social	social	worker	NA	NA	dominguez	8075
1064.H.CV74	TTGGTAAAGTGC	NA	NA	NA	Puerto Rico	Apis	mellifera	social	social	worker	NA	NA	dominguez	38
1064.H.CV75	AACCGATGTACC	NA	NA	NA	Puerto Rico	Apis	mellifera	social	social	worker	NA	NA	dominguez	109
1064.H.CV76	GCATTACTGGAC	NA	NA	NA	Puerto Rico	Apis	mellifera	social	social	worker	NA	NA	dominguez	18918
1064.H.CV77	CACACAAAGTCA	NA	NA	NA	Puerto Rico	Apis	mellifera	social	social	worker	NA	NA	dominguez	72
1064.H.CV90	GGCGATTTACGT	NA	NA	NA	Puerto Rico	Apis	mellifera	social	social	drone	NA	NA	dominguez	30
1064.H.CV91	ACCCATACAGCC	NA	NA	NA	Puerto Rico	Apis	mellifera	social	social	drone	NA	NA	dominguez	14112
1064.H.CV92	CAGTCGTTAAGA	NA	NA	NA	Puerto Rico	Apis	mellifera	social	social	drone	NA	NA	dominguez	11486
1064.H.CV93	ATAATTGCCGAG	NA	NA	NA	Puerto Rico	Apis	mellifera	social	social	drone	NA	NA	dominguez	79
1064.H.CV94	AGGCACAGTAGG	NA	NA	NA	Puerto Rico	Apis	mellifera	social	social	drone	NA	NA	dominguez	20
1064.H.CV95	CTCTTCTGATCA	NA	NA	NA	Puerto Rico	Apis	mellifera	social	social	drone	NA	NA	dominguez	37
1064.H.GVR165	CTCATCATGTTC	NA	NA	NA	Puerto Rico	Apis	mellifera	social	social	worker	NA	NA	dominguez	3
1064.H.GVR166	GCAATCCTTGCG	NA	NA	NA	Puerto Rico	Apis	mellifera	social	social	worker	NA	NA	dominguez	14603
1064.H.GVR167	CAAGGCACAAGG	NA	NA	NA	Puerto Rico	Apis	mellifera	social	social	worker	NA	NA	dominguez	21958
1064.H.GVR168	TCCATTTCATGC	NA	NA	NA	Puerto Rico	Apis	mellifera	social	social	worker	NA	NA	dominguez	4
1064.H.GVR169	GTTTCACGCGAA	NA	NA	NA	Puerto Rico	Apis	mellifera	social	social	worker	NA	NA	dominguez	19438
1064.H.GVR170	TACTCTCTTAGC	NA	NA	NA	Puerto Rico	Apis	mellifera	social	social	worker	NA	NA	dominguez	9
1064.Royal.Jelly.30	GATCATTCTCTC	NA	NA	NA	Puerto Rico	Apis	mellifera	social	social	NA	NA	NA	dominguez	20302
1064.Royal.Jelly.36	AGACATACCGTA	NA	NA	NA	Puerto Rico	Apis	mellifera	social	social	NA	NA	NA	dominguez	15671
1064.Royal.Jelly.P4	TCTGAGGTTGCC	NA	NA	NA	Puerto Rico	Apis	mellifera	social	social	NA	NA	NA	dominguez	81
1064.W.CJV177	CATACACGCACC	NA	NA	NA	Puerto Rico	Apis	mellifera	social	social	larvae	NA	NA	dominguez	19031
1064.W.CJV178	ACCTCAGTCAAG	NA	NA	NA	Puerto Rico	Apis	mellifera	social	social	larvae	NA	NA	dominguez	16635
1064.W.CJV179	TCGACCAAACAC	NA	NA	NA	Puerto Rico	Apis	mellifera	social	social	larvae	NA	NA	dominguez	19370
1064.W.CJV180	CCACCCAGTAAC	NA	NA	NA	Puerto Rico	Apis	mellifera	social	social	larvae	NA	NA	dominguez	20975
1064.W.CJV181	ATATCGCGATGA	NA	NA	NA	Puerto Rico	Apis	mellifera	social	social	larvae	NA	NA	dominguez	20942
1064.W.CJV182	CGCCGGTAATCT	NA	NA	NA	Puerto Rico	Apis	mellifera	social	social	larvae	NA	NA	dominguez	21483
1064.W.CJV183	CCGATGCCTTGA	NA	NA	NA	Puerto Rico	Apis	mellifera	social	social	pupae	NA	NA	dominguez	10163
1064.W.CJV184	AGCAGGCACGAA	NA	NA	NA	Puerto Rico	Apis	mellifera	social	social	pupae	NA	NA	dominguez	21678
1064.W.CJV185	TACGCAGCACTA	NA	NA	NA	Puerto Rico	Apis	mellifera	social	social	pupae	NA	NA	dominguez	13524
1064.W.CJV186	CGCTTAGTGCTG	NA	NA	NA	Puerto Rico	Apis	mellifera	social	social	pupae	NA	NA	dominguez	17103
1064.W.CJV187	CAAAGTTTGCGA	NA	NA	NA	Puerto Rico	Apis	mellifera	social	social	pupae	NA	NA	dominguez	10924
1064.W.CJV188	TCGAGCCGATCT	NA	NA	NA	Puerto Rico	Apis	mellifera	social	social	pupae	NA	NA	dominguez	9
1064.W.CJV215	ACCATCCAACGA	NA	NA	NA	Puerto Rico	Apis	mellifera	social	social	larvae	NA	NA	dominguez	22
1064.W.CJV216	GCAATAGGAGGA	NA	NA	NA	Puerto Rico	Apis	mellifera	social	social	larvae	NA	NA	dominguez	11473
1064.W.CJV217	CCGAACGTCACT	NA	NA	NA	Puerto Rico	Apis	mellifera	social	social	larvae	NA	NA	dominguez	45
1064.W.CJV218	ACACCAACACCA	NA	NA	NA	Puerto Rico	Apis	mellifera	social	social	larvae	NA	NA	dominguez	35
1064.W.CJV219	CCATCACATAGG	NA	NA	NA	Puerto Rico	Apis	mellifera	social	social	larvae	NA	NA	dominguez	17
1064.W.CJV220	CGACACGGAGAA	NA	NA	NA	Puerto Rico	Apis	mellifera	social	social	larvae	NA	NA	dominguez	28
1064.W.CJV221	GAACCTATGACA	NA	NA	NA	Puerto Rico	Apis	mellifera	social	social	pupae	NA	NA	dominguez	14739
1064.W.CJV222	ATGCCGGTAATA	NA	NA	NA	Puerto Rico	Apis	mellifera	social	social	pupae	NA	NA	dominguez	8576
1064.W.CJV223	GAACAGCTCTAC	NA	NA	NA	Puerto Rico	Apis	mellifera	social	social	pupae	NA	NA	dominguez	12168
1064.W.CJV224	GTGAGTCATACC	NA	NA	NA	Puerto Rico	Apis	mellifera	social	social	pupae	NA	NA	dominguez	10701
1064.W.CJV225	TGGCCGTTACTG	NA	NA	NA	Puerto Rico	Apis	mellifera	social	social	pupae	NA	NA	dominguez	21673
1064.W.CJV226	TAGAGCTGCCAT	NA	NA	NA	Puerto Rico	Apis	mellifera	social	social	pupae	NA	NA	dominguez	9350
1064.W.CV123	CCAGACCGCTAT	NA	NA	NA	Puerto Rico	Apis	mellifera	social	social	larvae	NA	NA	dominguez	21290
1064.W.CV124	AGCTCTAGAAAC	NA	NA	NA	Puerto Rico	Apis	mellifera	social	social	larvae	NA	NA	dominguez	21261
1064.W.CV125	TCCATCGACGTG	NA	NA	NA	Puerto Rico	Apis	mellifera	social	social	larvae	NA	NA	dominguez	18189
1064.W.CV126	CGATGTGTGGTT	NA	NA	NA	Puerto Rico	Apis	mellifera	social	social	larvae	NA	NA	dominguez	16492
1064.W.CV127	GCGAAGTTGGGA	NA	NA	NA	Puerto Rico	Apis	mellifera	social	social	larvae	NA	NA	dominguez	15553
1064.W.CV128	GCATTCGGCGTT	NA	NA	NA	Puerto Rico	Apis	mellifera	social	social	larvae	NA	NA	dominguez	15773
1064.W.CV129	CGCCATTGTGCA	NA	NA	NA	Puerto Rico	Apis	mellifera	social	social	pupae	NA	NA	dominguez	21687
1064.W.CV130	TCCAACTGCAGA	NA	NA	NA	Puerto Rico	Apis	mellifera	social	social	pupae	NA	NA	dominguez	23293
1064.W.CV131	TAAAGACCCGTA	NA	NA	NA	Puerto Rico	Apis	mellifera	social	social	pupae	NA	NA	dominguez	9648
1064.W.CV132	TGTATCTTCACC	NA	NA	NA	Puerto Rico	Apis	mellifera	social	social	pupae	NA	NA	dominguez	24139
1064.W.CV133	GACTGACTCGTC	NA	NA	NA	Puerto Rico	Apis	mellifera	social	social	pupae	NA	NA	dominguez	18604
1064.W.CV134	TCGTGGATAGCT	NA	NA	NA	Puerto Rico	Apis	mellifera	social	social	pupae	NA	NA	dominguez	15978
1064.W.CV251	CGTTCTGGTGGT	NA	NA	NA	Puerto Rico	Apis	mellifera	social	social	larvae	NA	NA	dominguez	27
1064.W.CV252	TTGGTCTCCTCT	NA	NA	NA	Puerto Rico	Apis	mellifera	social	social	larvae	NA	NA	dominguez	19800
1064.W.CV253	CTGCATACTGAG	NA	NA	NA	Puerto Rico	Apis	mellifera	social	social	larvae	NA	NA	dominguez	11757
1064.W.CV254	CAGGGCCTTTGT	NA	NA	NA	Puerto Rico	Apis	mellifera	social	social	larvae	NA	NA	dominguez	24434
1064.W.CV255	CGATGAATATCG	NA	NA	NA	Puerto Rico	Apis	mellifera	social	social	larvae	NA	NA	dominguez	23218
1064.W.CV256	GTCAATTAGTGG	NA	NA	NA	Puerto Rico	Apis	mellifera	social	social	larvae	NA	NA	dominguez	3556
1064.W.CV257	AGTACGCAGTCT	NA	NA	NA	Puerto Rico	Apis	mellifera	social	social	pupae	NA	NA	dominguez	4
1064.W.CV258	AGCAGCTATTGC	NA	NA	NA	Puerto Rico	Apis	mellifera	social	social	pupae	NA	NA	dominguez	647
1064.W.CV259	CTCGGATAGATC	NA	NA	NA	Puerto Rico	Apis	mellifera	social	social	pupae	NA	NA	dominguez	9
1064.W.CV260	TTCCCGAAACGA	NA	NA	NA	Puerto Rico	Apis	mellifera	social	social	pupae	NA	NA	dominguez	4537
1064.W.CV261	GAACTTTAGCGC	NA	NA	NA	Puerto Rico	Apis	mellifera	social	social	pupae	NA	NA	dominguez	3364
1064.W.CV262	TCCTTAGAAGGC	NA	NA	NA	Puerto Rico	Apis	mellifera	social	social	pupae	NA	NA	dominguez	14953
1064.W.CV269	CATGCCAACATG	NA	NA	NA	Puerto Rico	Apis	mellifera	social	social	pupae	NA	NA	dominguez	18688
1064.W.CV270	GAGTACAGTCTA	NA	NA	NA	Puerto Rico	Apis	mellifera	social	social	pupae	NA	NA	dominguez	12879
1064.W.CV271	CCTACATGAGAC	NA	NA	NA	Puerto Rico	Apis	mellifera	social	social	pupae	NA	NA	dominguez	17372
1064.W.CV272	TCCGTGGTATAG	NA	NA	NA	Puerto Rico	Apis	mellifera	social	social	pupae	NA	NA	dominguez	20847
1064.W.CV273	TCTACGGCACGT	NA	NA	NA	Puerto Rico	Apis	mellifera	social	social	pupae	NA	NA	dominguez	21499
1064.W.CV274	ATGCTGCAACAC	NA	NA	NA	Puerto Rico	Apis	mellifera	social	social	pupae	NA	NA	dominguez	16027
1064.W.CV275	GCAACCGATTGT	NA	NA	NA	Puerto Rico	Apis	mellifera	social	social	larvae	NA	NA	dominguez	17938
1064.W.CV276	CATGTGCTTAGG	NA	NA	NA	Puerto Rico	Apis	mellifera	social	social	larvae	NA	NA	dominguez	24614
1064.W.CV277	GTTCCTCCATTA	NA	NA	NA	Puerto Rico	Apis	mellifera	social	social	larvae	NA	NA	dominguez	20697
1064.W.CV278	ACCTGTCCTTTC	NA	NA	NA	Puerto Rico	Apis	mellifera	social	social	larvae	NA	NA	dominguez	19629
1064.W.CV279	GTTCACGCCCAA	NA	NA	NA	Puerto Rico	Apis	mellifera	social	social	larvae	NA	NA	dominguez	14276
1064.W.CV280	CGATCGAACACT	NA	NA	NA	Puerto Rico	Apis	mellifera	social	social	larvae	NA	NA	dominguez	10729
1064.W.CV348	GATGATAACCCA	NA	NA	NA	Puerto Rico	Apis	mellifera	social	social	larvae	NA	NA	dominguez	19279
1064.W.CV349	GGCCCAATATAA	NA	NA	NA	Puerto Rico	Apis	mellifera	social	social	larvae	NA	NA	dominguez	8
1064.W.CV350	TTGTATGACAGG	NA	NA	NA	Puerto Rico	Apis	mellifera	social	social	larvae	NA	NA	dominguez	24341
1064.W.CV351	GGTAAGTTTGAC	NA	NA	NA	Puerto Rico	Apis	mellifera	social	social	larvae	NA	NA	dominguez	10518
1064.W.CV352	CTACCACGGTAC	NA	NA	NA	Puerto Rico	Apis	mellifera	social	social	larvae	NA	NA	dominguez	24380
1064.W.CV353	CGGTCTGTCTGA	NA	NA	NA	Puerto Rico	Apis	mellifera	social	social	larvae	NA	NA	dominguez	24513
1064.W.CV354	GTACATGTCGCC	NA	NA	NA	Puerto Rico	Apis	mellifera	social	social	pupae	NA	NA	dominguez	2
1064.W.CV355	TTCTAGAGTGCG	NA	NA	NA	Puerto Rico	Apis	mellifera	social	social	pupae	NA	NA	dominguez	3243
1064.W.CV356	ACGGATGTTATG	NA	NA	NA	Puerto Rico	Apis	mellifera	social	social	pupae	NA	NA	dominguez	12910
1064.W.CV357	TTGAGGCTACAA	NA	NA	NA	Puerto Rico	Apis	mellifera	social	social	pupae	NA	NA	dominguez	22146
1064.W.CV358	GTAGGAACCGGA	NA	NA	NA	Puerto Rico	Apis	mellifera	social	social	pupae	NA	NA	dominguez	3
1064.W.CV359	ACATCTAGCAGA	NA	NA	NA	Puerto Rico	Apis	mellifera	social	social	pupae	NA	NA	dominguez	3
Agapostemon.virescens	CTGGTGCTGAAT	NA	NA	NA	See reference	Agapostemon	virescens	NA	NA	abdomen	NA	NA	martinson	273
Apis.andreniformis	CTGGTGCTGAAT	NA	NA	NA	See reference	Apis	andreniformis	NA	NA	abdomen	NA	NA	martinson	78
Apis.dorsata	CTGGTGCTGAAT	NA	NA	NA	See reference	Apis	dorsata	NA	NA	abdomen	NA	NA	martinson	72
Apis.mellifera	CTGGTGCTGAAT	NA	NA	NA	See reference	Apis	mellifera	NA	NA	abdomen	NA	NA	martinson	538
Bombus.impatiens	CTGGTGCTGAAT	NA	NA	NA	See reference	Bombus	impatiens	NA	NA	gut	NA	NA	martinson	71
Bombus.sonorus	CTGGTGCTGAAT	NA	NA	NA	See reference	Bombus	sonorus	NA	NA	gut	NA	NA	martinson	78
Bombus.sp.	CTGGTGCTGAAT	NA	NA	NA	See reference	Bombus	sp	NA	NA	gut	NA	NA	martinson	80
Calliopsis.subalpinus	CTGGTGCTGAAT	NA	NA	NA	See reference	Calliopsis	subalpinus	NA	NA	abdomen	NA	NA	martinson	282
Caupolicana.yarrowi	CTGGTGCTGAAT	NA	NA	NA	See reference	Caupolicana	yarrowi	NA	NA	abdomen	NA	NA	martinson	256
Chalybion.californicum	CTGGTGCTGAAT	NA	NA	NA	See reference	Chalybion	californicum	NA	NA	abdomen	NA	NA	martinson	204
Colletes.inaequalis	CTGGTGCTGAAT	NA	NA	NA	See reference	Colletes	inaequalis	NA	NA	abdomen	NA	NA	martinson	301
Diadasia.opuntiae	CTGGTGCTGAAT	NA	NA	NA	See reference	Diadasia	opuntiae	NA	NA	abdomen	NA	NA	martinson	347
Halictus.patellatus	CTGGTGCTGAAT	NA	NA	NA	See reference	Halictus	patellatus	NA	NA	abdomen	NA	NA	martinson	305
Hesperapis.cockerelli	CTGGTGCTGAAT	NA	NA	NA	See reference	Hesperapis	cockerelli	NA	NA	abdomen	NA	NA	martinson	349
Hoplitis.biscutellae	CTGGTGCTGAAT	NA	NA	NA	See reference	Hoplitis	biscutellae	NA	NA	abdomen	NA	NA	martinson	182
Megachile.odontostoma	CTGGTGCTGAAT	NA	NA	NA	See reference	Megachile	odontostoma	NA	NA	abdomen	NA	NA	martinson	338
Paragia.vespiformis	CTGGTGCTGAAT	NA	NA	NA	See reference	Paragia	vespiformis	NA	NA	abdomen	NA	NA	martinson	247
Philanthus.gibbosus	CTGGTGCTGAAT	NA	NA	NA	See reference	Philanthus	gibbosus	NA	NA	abdomen	NA	NA	martinson	360
Rediviva.saetigera	CTGGTGCTGAAT	NA	NA	NA	See reference	Rediviva	saetigera	NA	NA	abdomen	NA	NA	martinson	333
SDK001	CTACCGATTGCG	MALb	43.64	3.877	Montpelier	Lasioglossum	leucozonium	solitary	solitary	abdomen	6.97	8619.23	current	41177
SDK002	GTTTGCTCGAGA	MALb	43.64	3.877	Montpelier	Lasioglossum	laticeps	social	social	abdomen	7.12	73050	current	36801
SDK003	CAAACGCACTAA	MALb	43.64	3.877	Montpelier	Lasioglossum	malachurum	social	social	abdomen	18.48	205063	current	32860
SDK004	TCACCCAAGGTA	MALb	43.64	3.877	Montpelier	Lasioglossum	leucozonium	solitary	solitary	abdomen	10	77947.4	current	45484
SDK005	GAACAAAGAGCG	MALb	43.64	3.877	Montpelier	Lasioglossum	leucozonium	solitary	solitary	abdomen	16.56	52122.4	current	39993
SDK007	ATGTGCTGCTCG	MALb	43.64	3.877	Montpelier	Lasioglossum	laticeps	social	social	abdomen	20	5933.88	current	65103
SDK009	CTGGCATCTAGC	ARN	44.5507	5.96635	PACA	Lasioglossum	nigripes	social	social	abdomen	16.9	19242.9	current	47442
SDK010	GGTGGTCGTTCT	SAL-LESARG	43.9011	0.09007	Aquitaine	Lasioglossum	pauxillum	social	social	abdomen	8.8	16444.2	current	55833
SDK011	ACTATGGGCTAA	ARN	44.5507	5.96635	PACA	Lasioglossum	pauxillum	social	social	abdomen	10	35072.1	current	57312
SDK012	GCATTGAGTTCG	ARN	44.5507	5.96635	PACA	Halictus	maculatus	social	social	abdomen	19.9	11026.6	current	35157
SDK013	GCTAAGTGATGT	VEN	44.181	5.25887	PACA	Lasioglossum	malachurum	social	social	abdomen	9.7	45535.7	current	37052
SDK015	GTTGCTGAGTCC	VEN	44.181	5.25887	PACA	Lasioglossum	pauxillum	social	social	abdomen	5.78	15913.5	current	46163
SDK016	ACGCTTAACGAC	VEN	44.181	5.25887	PACA	Lasioglossum	nigripes	social	social	abdomen	21.2	14430.1	current	80010
SDK017	AGCCAGTCATAC	VEN	44.181	5.25887	PACA	Lasioglossum	leucozonium	solitary	solitary	abdomen	13	165167	current	36620
SDK018	TAACGGCGCTCT	VEN	44.181	5.25887	PACA	Lasioglossum	leucozonium	solitary	solitary	abdomen	15.8	140720	current	36593
SDK020	AAGGGACAAGTG	VEN	44.181	5.25887	PACA	Lasioglossum	leucozonium	solitary	solitary	abdomen	14.12	140060	current	32330
SDK022	ACGGCTAGTTCC	VEN	44.181	5.25887	PACA	Lasioglossum	laticeps	social	social	abdomen	10.1	15144.9	current	45940
SDK023	AGCTTACCGACC	CHAU	47.0185	6.94614	Suisse	Lasioglossum	leucozonium	solitary	solitary	abdomen	28.2	16713.9	current	81282
SDK024	AGTGTCGATTCG	VEN	44.181	5.25887	PACA	Lasioglossum	nigripes	social	social	abdomen	14.9	18869	current	33385
SDK025	CTATTAAGCGGC	VEN	44.181	5.25887	PACA	Lasioglossum	malachurum	social	social	abdomen	11.36	30920	current	37666
SDK026	CCTACCATTGTT	VEN	44.181	5.25887	PACA	Lasioglossum	leucozonium	solitary	solitary	abdomen	17.04	52889.5	current	36777
SDK029	CTATGGTGAACC	VEN	44.181	5.25887	PACA	Halictus	scabiosae	social	social	abdomen	5.74	2168.81	current	49477
SDK030	GAGTCCGTTGCT	VEN	44.181	5.25887	PACA	Lasioglossum	leucozonium	solitary	solitary	abdomen	10.92	37453.3	current	46162
SDK033	GGACCAAGGGAT	VEN	44.181	5.25887	PACA	Lasioglossum	limbellum	solitary	solitary	abdomen	8.1	4108.11	current	42736
SDK035	GATAACTGTACG	VEN	44.181	5.25887	PACA	Lasioglossum	leucozonium	solitary	solitary	abdomen	16.52	28773.6	current	33870
SDK037	TAAACCTGGACA	EYZ	44.55	1	Aquitaine	Lasioglossum	malachurum	social	social	abdomen	9.14	29844.4	current	38881
SDK040	CCGAATTGACAA	EYZ	44.55	1	Aquitaine	Lasioglossum	leucozonium	solitary	solitary	abdomen	7.36	17520.3	current	40508
SDK041	GTATTGGTCAGA	GEN	46.16	6.53	Suisse	Lasioglossum	leucozonium	solitary	solitary	abdomen	16.02	16708.8	current	49406
SDK043	AGAACCGTCATA	GEN	46.16	6.53	Suisse	Lasioglossum	nigripes	social	social	abdomen	14.76	18309.3	current	39026
SDK044	AACTGGAACCCT	GEN	46.16	6.53	Suisse	Halictus	tumulorum	unknown	polymorphic	abdomen	8.98	17926.9	current	79575
SDK045	AGGGCTATAGTT	LONG	48.0673	6.94831	Vosges	Lasioglossum	leucozonium	solitary	solitary	abdomen	16.54	76286	current	81045
SDK047	TGTCTCGCAAGC	VEN	44.181	5.25887	PACA	Lasioglossum	pauxillum	social	social	abdomen	6.22	3034.84	current	44752
SDK050	TACGTACGAAAC	BRS	46.6355	6.26702	Suisse	Halictus	tumulorum	solitary	polymorphic	abdomen	8.3	NA	current	66256
SDK051	CAGCCGCATATC	VEN	44.181	5.25887	PACA	Halictus	maculatus	social	social	abdomen	10.34	173995	current	46424
SDK055	GCACTGGCATAT	VEN	44.181	5.25887	PACA	Halictus	fulvipes	social	social	abdomen	5.68	7193.67	current	38006
SDK056	GGCATTAGTTGA	AUD	50.908	1.805	Calais	Halictus	tumulorum	social	polymorphic	abdomen	9.72	38991.4	current	42725
SDK058	GATACGTTCGCA	CHAMP	45.6425	3.15633	Auvergne	Lasioglossum	malachurum	social	social	abdomen	11.16	53212.3	current	80734
SDK060	CCAAGATTCGCC	CHAMP	45.6425	3.15633	Auvergne	Halictus	scabiosae	social	social	abdomen	8.32	20746	current	73642
SDK061	GAGGCTGATTTA	CHAMP	45.6425	3.15633	Auvergne	Lasioglossum	leucozonium	solitary	solitary	abdomen	9.64	30424.2	current	64527
SDK063	GAGTTAGCATCA	CAMP-PEL	44.9538	1.04248	Aquitaine	Halictus	maculatus	social	social	abdomen	8.92	4120.57	current	47284
SDK064	ATCACATTCTCC	CAMP-PEL	44.9538	1.04248	Aquitaine	Halictus	maculatus	social	social	abdomen	12.84	6077.06	current	41688
SDK065	TGTAGTATAGGC	CAMP-PEL	44.9538	1.04248	Aquitaine	Lasioglossum	leucozonium	solitary	solitary	abdomen	26.4	12736.1	current	42379
SDK066	CGGTAGTTGATC	BUZ	43.7608	1.57397	MidiP	Lasioglossum	pauxillum	social	social	abdomen	8.26	8484.65	current	49166
SDK067	CTCACGCAATGC	BUZ	43.7608	1.57397	MidiP	Halictus	scabiosae	social	social	abdomen	19.18	14119.9	current	36800
SDK068	TGAAAGCGGCGA	BUZ	43.7608	1.57397	MidiP	Lasioglossum	leucozonium	solitary	solitary	abdomen	10.74	2642.64	current	47673
SDK070	AGCCTGGTACCT	AI-PARIS	48.8498	2.32561	Paris	Halictus	maculatus	social	social	abdomen	6.7	52133.3	current	41799
SDK072	GTCCCGTGAAAT	CLER	45.6981	3.17607	Auvergne	Lasioglossum	malachurum	social	social	abdomen	19.58	27138.5	current	40421
SDK075	GGTTACGGTTAC	CLER	45.6981	3.17607	Auvergne	Halictus	scabiosae	social	social	abdomen	26.8	23250.1	current	79262
SDK076	ACATCAGGTCAC	CLER	45.6981	3.17607	Auvergne	Lasioglossum	morio	social	social	abdomen	5.54	4007.74	current	53141
SDK077	GCTAAAGTCGTA	NIEV	51.127	2.749	Calais	Lasioglossum	morio	social	social	abdomen	4.28	3266.8	current	38547
SDK080	TCTCAGCGCGTA	THO	44.1188	6.14352	PACA	Lasioglossum	nigripes	social	social	abdomen	12.14	10634.3	current	47891
SDK081	GGACAGTGTATT	THO	44.1188	6.14352	PACA	Lasioglossum	malachurum	social	social	abdomen	8.82	18136.4	current	46263
SDK084	ACACGACTATAG	THO	44.1188	6.14352	PACA	Lasioglossum	pauxillum	social	social	abdomen	12.84	12189.8	current	39554
SDK087	GTGTAGGTGCTT	LES	46.0687	7.025	Suisse	Lasioglossum	laticeps	social	social	abdomen	7.1	3578.19	current	26331
SDK088	GACCCTAGACCT	LES	46.0687	7.025	Suisse	Lasioglossum	laticeps	social	social	abdomen	8.48	15802.4	current	48775
SDK089	TATTCAGCGGAC	LES	46.0687	7.025	Suisse	Lasioglossum	laticeps	social	social	abdomen	6.46	57050.3	current	48495
SDK090	TGAACTAGCGTC	CEU	44.5189	539368056	PACA	Halictus	maculatus	social	social	abdomen	9.2	5163.37	current	23427
SDK091	GTTCCGGATTAG	CEU	44.5189	539368056	PACA	Halictus	maculatus	social	social	abdomen	7.68	714.914	current	22523
SDK093	GTTGATACGATG	CEU	44.5189	539368056	PACA	Lasioglossum	albipes	solitary	polymorphic	abdomen	15.6	10439.5	current	60841
SDK095	ACTCGGCCAACT	CEU	44.5189	539368056	PACA	Lasioglossum	albipes	solitary	solitary	abdomen	12.08	21686.9	current	69367
SDK096	TCCGAGTCACCA	FIG	44.6367	1.53092	Aquitaine	Lasioglossum	limbellum	solitary	solitary	abdomen	8.72	67396.8	current	29944
SDK097	CAGACACTTCCG	FIG	44.6367	1.53092	Aquitaine	Lasioglossum	nigripes	social	social	abdomen	24.6	73173.3	current	69941
SDK098	TCCTCTTTGGTC	FIG	44.6367	1.53092	Aquitaine	Lasioglossum	malachurum	social	social	abdomen	13.38	31346.4	current	49546
SDK101	GCGTGTAATTAG	FIG	44.6367	1.53092	Aquitaine	Lasioglossum	limbellum	solitary	solitary	abdomen	3.9	2363.29	current	36461
SDK102	TCCACCCTCTAT	FIG	44.6367	1.53092	Aquitaine	Lasioglossum	pauxillum	social	social	abdomen	10.36	9119.49	current	34895
SDK104	CTGTAGCTTGGC	VEN	44.181	5.25887	PACA	Halictus	fulvipes	social	social	abdomen	0.916	427.603	current	25786
SDK105	ATGCCTCGTAAG	VEN	44.181	5.25887	PACA	Halictus	scabiosae	social	social	abdomen	3.3	5133.49	current	26005
SDK107	ACCTATGGTGAA	VEN	44.181	5.25887	PACA	Lasioglossum	fulvicorne	social	social	abdomen	4.76	8149.32	current	44552
SDK108	TCACCATCCGAG	ROC	44.7554	1.62812	Aquitaine	Lasioglossum	nigripes	social	social	abdomen	14.02	48582.8	current	62683
SDK110	ACCCACCACTAG	ROC	44.7554	1.62812	Aquitaine	Lasioglossum	malachurum	social	social	abdomen	25.6	572109	current	58831
SDK111	CAGAAGGTGTGG	ROC	44.7554	1.62812	Aquitaine	Lasioglossum	nigripes	social	social	abdomen	35.2	24357.8	current	73539
SDK113	CTGTTACAGCGA	SAU	42.8779	1.54814	MidiP	Lasioglossum	lativentre	unknown	unknown	abdomen	7.34	14578.5	current	47333
SDK114	GAAGCTTGAATC	ROC	44.7554	1.62812	Aquitaine	Lasioglossum	albipes	social	polymorphic	abdomen	11.74	8641.85	current	65455
SDK116	ACTAGGATCAGT	ROC	44.7554	1.62812	Aquitaine	Lasioglossum	laticeps	social	social	abdomen	8.28	1546.81	current	64538
SDK120	CAGTCAGGCCTT	LEV	44.7405	1.45978	Aquitaine	Lasioglossum	villosulum	solitary	solitary/communal	abdomen	8.04	30111.1	current	38834
SDK121	GCTCCTTAGAAG	LEV	44.7405	1.45978	Aquitaine	Lasioglossum	interruptum	social	social	abdomen	12.06	7824.06	current	65313
SDK122	ACTGAGCTGCAT	LEV	44.7405	1.45978	Aquitaine	Lasioglossum	interruptum	social	social	abdomen	5.84	7615.11	current	56091
SDK123	TCCCATTCCCAT	MALb	43.64	3.877	Montpelier	Halictus	scabiosae	social	social	abdomen	4.02	7838.45	current	63419
SDK124	TGGCGTCATTCG	MALb	43.64	3.877	Montpelier	Halictus	maculatus	social	social	abdomen	8.2	2589.69	current	60375
SDK125	ACGAAGTCTACC	MALb	43.64	3.877	Montpelier	Halictus	maculatus	social	social	abdomen	9.46	12639.2	current	52424
SDK127	ACCGTCTTTCTC	ARN	44.5507	5.96635	PACA	Halictus	maculatus	social	social	abdomen	5	15430.5	current	20795
SDK128	AGTCTGTCTGCG	SAU	42.8779	1.54814	MidiP	Lasioglossum	laevigatum	solitary	solitary	abdomen	7.82	20420.7	current	44353
SDK130	AATCCTCGGAGT	CEU	44.5189	539368056	PACA	Halictus	tumulorum	solitary	polymorphic	abdomen	5.14	3482.19	current	74280
SDK131	CCGCACTCAAGT	BRS	46.6355	6.26702	Suisse	Lasioglossum	calceatum	social	social	abdomen	7.98	7247.44	current	44597
SDK133	CTGGACGCATTA	ARN	44.5507	5.96635	PACA	Lasioglossum	malachurum	social	social	abdomen	2.08	6374.5	current	61879
SDK137	TGTGGAAACTCC	SAU	42.8779	1.54814	MidiP	Lasioglossum	calceatum	social	social	abdomen	22.2	31896.8	current	45079
SDK140	GTTGGTTGGCAT	unknown	NA	NA	unknown	Lasioglossum	albipes	solitary	solitary	abdomen	12.8	35469.8	current	81323
SDK141	TTAGGCAGGTTC	LAK	46.3506	6.88356	Suisse	Halictus	scabiosae	social	social	abdomen	10.2	9162.69	current	33769
SDK142	TTCCACACGTGG	MOV	44.1765	5.24652	PACA	Halictus	scabiosae	social	social	abdomen	17.72	8715.01	current	64412
SDK144	AACCCAGATGAT	CEU	44.5189	539368056	PACA	Lasioglossum	albipes	solitary	polymorphic	abdomen	7.3	7637.89	current	57787
SDK145	TAAGACTACTGG	CLER	45.6981	3.17607	Auvergne	Lasioglossum	malachurum	social	social	abdomen	6.56	26825.3	current	42327
SDK146	CGCGAAGTTTCA	CLER	45.6981	3.17607	Auvergne	Halictus	scabiosae	social	social	abdomen	34.6	1755.85	current	32205
SDK147	GTAGTGTCAACA	CLER	45.6981	3.17607	Auvergne	Lasioglossum	pauxillum	social	social	abdomen	4.74	44544.8	current	56384
SDK157	TGGAGAGGAGAT	VOS	48.1656	6.93365	Vosges	Halictus	scabiosae	social	social	abdomen	9.5	15448.6	current	67909
SDK160	CGATACACTGCC	RIM	43.0176	1.28242	MidiP	Lasioglossum	calceatum	social	social	abdomen	13.78	16820.6	current	35377
SDK161	TTGAAATCCCGG	RIM	43.0176	1.28242	MidiP	Lasioglossum	calceatum	social	social	abdomen	8.06	12072.9	current	25489
SDK162	GTTAGGGAGCGA	FTZ	50.8773	1.65787	Calais	Lasioglossum	laticeps	social	social	abdomen	4.36	2736.52	current	42643
SDK163	TTACTGTGGCCG	SAU	42.8779	1.54814	MidiP	Lasioglossum	albipes	social	polymorphic	abdomen	9.4	14129.9	current	67634
SDK164	ATATAAGGCCCA	SAU	42.8779	1.54814	MidiP	Lasioglossum	calceatum	social	social	abdomen	11.54	43069.5	current	24913
SDK165	ACGTAACCACGT	FTZ	50.8773	1.65787	Calais	Lasioglossum	laticeps	social	social	abdomen	6.72	3412.52	current	43079
SDK166	GTCGGAAATTGT	FTZ	50.8773	1.65787	Calais	Lasioglossum	laticeps	social	social	abdomen	10.68	42541.3	current	32206
SDK167	TCTAACGAGTGC	RIM	43.0176	1.28242	MidiP	Lasioglossum	calceatum	social	social	abdomen	5.44	13133.4	current	21109
SDK168	CATCTGGGCAAT	RIM	43.0176	1.28242	MidiP	Lasioglossum	albipes	social	polymorphic	abdomen	3.9	9680.52	current	38548
SDK169	CGTATAAATGCG	RIM	43.0176	1.28242	MidiP	Lasioglossum	albipes	social	polymorphic	abdomen	7.48	9016.13	current	76425
SDK170	AATACAGACCTG	VEN	44.181	5.25887	PACA	Lasioglossum	calceatum	social	social	abdomen	4.74	3079.47	current	96221
SDK171	GACTCAACCAGT	unknown	NA	NA	unknown	Lasioglossum	calceatum	social	social	abdomen	5.24	5299.37	current	73245
SDK172	GGAAGAAGTAGC	RIM	43.0176	1.28242	MidiP	Lasioglossum	albipes	social	polymorphic	abdomen	1.682	18964.5	current	75929
SDK173	ATCGATCCACAG	RIM	43.0176	1.28242	MidiP	Lasioglossum	calceatum	social	social	abdomen	10.6	19094.9	current	95662
SDK174	ACACCGCACAAT	RIM	43.0176	1.28242	MidiP	Lasioglossum	calceatum	social	social	abdomen	13.6	78257.6	current	71642
SDK177	GTCTCCTCCCTT	ZZ	44.9231	1.01774	Aquitaine	Lasioglossum	nigripes	social	social	abdomen	7.18	9620.81	current	133436
SDK179	GTAGCACTCATG	VEN	44.181	5.25887	PACA	Lasioglossum	albipes	solitary	polymorphic	abdomen	3.58	28874.4	current	141728
SDK180	CACCTGTAGTAG	CLER	45.6981	3.17607	Auvergne	Lasioglossum	nigripes	social	social	abdomen	10.94	43093.1	current	110244
SDK181	CACGAGCTACTC	CLER	45.6981	3.17607	Auvergne	Lasioglossum	albipes	unknown	polymorphic	abdomen	8.84	27184.5	current	137527
SDK183	TCTCGATAAGCG	unknown	NA	NA	unknown	Lasioglossum	mediterraneum	unknown	unknown	abdomen	11.26	3626.18	current	108774
SDK185	AGACAAGCTTCC	unknown	NA	NA	unknown	Lasioglossum	albipes	unknown	unknown	abdomen	8.86	12780.5	current	148182
SDK186	TCCGCAACCTGA	ROCA	44.73	1.61921	Aquitaine	Lasioglossum	villosulum	solitary	solitary/communal	abdomen	5.82	25181.6	current	23327
SDK187	TCACTTGGTGCG	PYL	44.4316	-1.18775	Aquitaine	Lasioglossum	villosulum	solitary	solitary/communal	abdomen	5.74	19976.4	current	28646
SDK188	TTATGTACGGCG	ROCA	44.73	1.61921	Aquitaine	Lasioglossum	villosulum	solitary	solitary/communal	abdomen	6.54	67268.4	current	28264
SDK189	TTGGACGTCCAC	PYL	44.4316	-1.18775	Aquitaine	Lasioglossum	villosulum	solitary	solitary/communal	abdomen	7.04	26637.2	current	24233
SDK190	TCCAGGGCTATA	RIM	43.0176	1.28242	MidiP	Lasioglossum	laevigatum	solitary	solitary	abdomen	13.48	78900.4	current	41443
SDK191	GCGTAGAGAGAC	EYZ	44.55	1	Aquitaine	Lasioglossum	villosulum	solitary	solitary/communal	abdomen	5.04	15722	current	28447
SDK192	GAAACTCCTAGA	EYZ	44.55	1	Aquitaine	Lasioglossum	pauxillum	social	social	abdomen	5.48	3228.36	current	49997
SDK193	ATCGGGCTTAAC	MTCALM	42.6917	1.42892	MidiP	Halictus	tumulorum	unknown	polymorphic	abdomen	7.96	14885	current	38112
SDK194	TACGCCCATCAG	MTCALM	42.6917	1.42892	MidiP	Lasioglossum	albipes	solitary	polymorphic	abdomen	9.74	33355.3	current	64712
SDK195	AAGATCGTACTG	RIM	43.0176	1.28242	MidiP	Lasioglossum	marginatum	social	social	abdomen	9	10093.4	current	68403
SDK196	ACTCATCTTCCA	AI-PARIS	48.8498	2.32561	Paris	Lasioglossum	pauxillum	social	social	abdomen	3.54	3022.25	current	53876
SDK197	GCATGCATCCCA	ABE	44.1433	10.6568	Tuscany	Lasioglossum	albipes	solitary	polymorphic	gut	15.78	354558	current	29584
SDK198	GATCTAATCGAG	ABE	44.1433	10.6568	Tuscany	Lasioglossum	albipes	solitary	polymorphic	gut	4.62	11653.8	current	31157
SDK199	AATCTTGCGCCG	ABE	44.1433	10.6568	Tuscany	Lasioglossum	albipes	solitary	polymorphic	gut	2.76	1772.34	current	24777
SDK200	GGAAATCCCATC	ABE	44.1433	10.6568	Tuscany	Lasioglossum	albipes	solitary	polymorphic	gut	6.04	17689	current	32659
SDK201	GACCGTCAATAC	ABE	44.1433	10.6568	Tuscany	Lasioglossum	albipes	solitary	polymorphic	gut	4.88	1797.29	current	28734
SDK202	TTGGAACGGCTT	ABE	44.1433	10.6568	Tuscany	Lasioglossum	albipes	solitary	polymorphic	gut	13.24	26867.6	current	29796
SDK203	TCCTAGGTCCGA	ABE	44.1433	10.6568	Tuscany	Lasioglossum	albipes	solitary	polymorphic	gut	12.58	43663.6	current	47597
SDK204	ACCAACAGATTG	ABE	44.1433	10.6568	Tuscany	Lasioglossum	albipes	solitary	polymorphic	gut	5.9	9624.15	current	39313
SDK205	GTGGCCTACTAC	ABE	44.1433	10.6568	Tuscany	Lasioglossum	albipes	solitary	polymorphic	gut	3.26	16265.2	current	31320
SDK206	TTCCCTTCTCCG	ABE	44.1433	10.6568	Tuscany	Lasioglossum	albipes	solitary	polymorphic	gut	3.62	12159.7	current	38584
SDK207	CATTTGACGACG	ABE	44.1433	10.6568	Tuscany	Lasioglossum	albipes	solitary	polymorphic	gut	23.2	18567.6	current	32585
SDK208	AAGTGAAGCGAG	ABE	44.1433	10.6568	Tuscany	Lasioglossum	albipes	solitary	polymorphic	gut	2.66	8025.68	current	33247
SDK209	TGCCGCCGTAAT	ABE	44.1433	10.6568	Tuscany	Lasioglossum	albipes	solitary	polymorphic	gut	2.6	16268.7	current	39173
SDK210	TCCTCACTATCA	ABE	44.1433	10.6568	Tuscany	Lasioglossum	calceatum	social	social	gut	5.76	11356.8	current	39323
SDK211	AACCTCGGATAA	ABE	44.1433	10.6568	Tuscany	Lasioglossum	calceatum	social	social	gut	4.7	2733.31	current	27216
SDK212	GCCTGCAGTACT	LUC	43.8466	10.4986	Italy	Lasioglossum	malachurum	social	social	gut	3.48	6102.63	current	34052
SDK213	GCCCAAGTTCAC	LUC	43.8466	10.4986	Italy	Lasioglossum	malachurum	social	social	gut	3.34	15414.8	current	45305
SDK214	ATAAAGAGGAGG	LUC	43.8466	10.4986	Italy	Lasioglossum	malachurum	social	social	gut	3.94	14447.6	current	31183
SDK215	GCGCCGAATCTT	LUC	43.8466	10.4986	Italy	Lasioglossum	malachurum	social	social	gut	2.82	3254.3	current	30509
SDK216	ATCCCAGCATGC	LUC	43.8466	10.4986	Italy	Lasioglossum	malachurum	social	social	gut	3.26	4026.14	current	42720
SDK217	GCTTCCAGACAA	LUC	43.8466	10.4986	Italy	Lasioglossum	malachurum	social	social	gut	2.9	31312.2	current	38838
SDK218	GTGCTTGTGTAG	LUC	43.8466	10.4986	Italy	Lasioglossum	malachurum	social	social	gut	4.56	266598	current	31545
SDK219	CAACTAGACTCG	LUC	43.8466	10.4986	Italy	Lasioglossum	malachurum	social	social	gut	3.62	15995.7	current	47085
SDK220	AGTGCCCTTGGT	LUC	43.8466	10.4986	Italy	Lasioglossum	malachurum	social	social	gut	2.5	12524.9	current	39816
SDK221	GGAACGACGTGA	LUC	43.8466	10.4986	Italy	Lasioglossum	malachurum	social	social	gut	3.04	8719.57	current	58011
SDK222	ACACAGTCCTGA	ABE	44.1433	10.6568	Tuscany	Sphecodes	geoffrellus	parasite	parasite	gut	4.12	7417.68	current	38069
SDK223	TGTCAGCTGTCG	ABE	44.1433	10.6568	Tuscany	Sphecodes	unknown	parasite	parasite	gut	5.76	127632	current	56290
SDK224	ATTATACGGCGC	ABE	44.1433	10.6568	Tuscany	Halictus	pollinosus	unknown	unknown	gut	6.42	14459.5	current	42147
SDK225	ATTCAGATGGCA	LUC	43.8466	10.4986	Italy	Halictus	crenicornis	social	social	gut	3.2	210.177	current	20317
SDK226	CTGGTGCTGAAT	LUC	43.8466	10.4986	Italy	Halictus	pollinosus	unknown	unknown	gut	4.98	9163.34	current	22405
SDK227	TAAACGCGACTC	VOS	48.1656	6.93365	Vosges	Lasioglossum	lativentre	unknown	unknown	gut	1.692	4089.92	current	29158
SDK228	CCTCGGGTACTA	VOS	48.1656	6.93365	Vosges	Halictus	maculatus	social	social	gut	0.978	396.529	current	8701
SDK229	GACAGAGGTGCA	VOS	48.1656	6.93365	Vosges	Halictus	unknown	unknown	unknown	gut	2.26	488.217	current	10890
SDK230	TCAGACCAACTG	OIS-AB	50.8773	1.65787	Calais	Lasioglossum	zonulum	solitary	solitary	gut	0.794	2086.59	current	31321
SDK231	AGTGATGTGACT	ARN	44.5507	5.96635	PACA	Halictus	rubicundus	solitary	polymorphic	abdomen	10.3	14870.2	current	29502
SDK234	TTCACCTGTATC	ROC	44.7554	1.62812	Aquitaine	Lasioglossum	albipes	social	polymorphic	abdomen	7.3	40107.5	current	41583
SDK235	CTCCAGGTCATG	VEN	44.181	5.25887	PACA	Halictus	rubicundus	solitary	polymorphic	abdomen	8.66	8571.83	current	31804
SDK236	CAGGATTCGTAC	VEN	44.181	5.25887	PACA	Sphecodes	unknown	parasite	parasite	abdomen	5.38	503342	current	30207
SDK237	CTTAGCTACTCT	ARN	44.5507	5.96635	PACA	Sphecodes	unknown	parasite	parasite	abdomen	6	610.345	current	31449
SDK238	CGCATACGACCT	AUD	50.908	1.805	Calais	Sphecodes	unknown	parasite	parasite	abdomen	2.88	4880.35	current	32248
SDK240	TCGGTCCATAGC	VEN	44.181	5.25887	PACA	Sphecodes	unknown	parasite	parasite	abdomen	2.48	5392.4	current	25487
Xylocopa.californica	CTGGTGCTGAAT	martinson	NA	NA	See reference	Xylocopa	californica	NA	NA	gut	NA	NA	martinson	305
